# Supplementary material
Source: publisher figshare collection journal article supplement (https://gsapubs.figshare.com/articles/dataset/_/12542915)
Supplement: Supplementary file 1 [file 1]

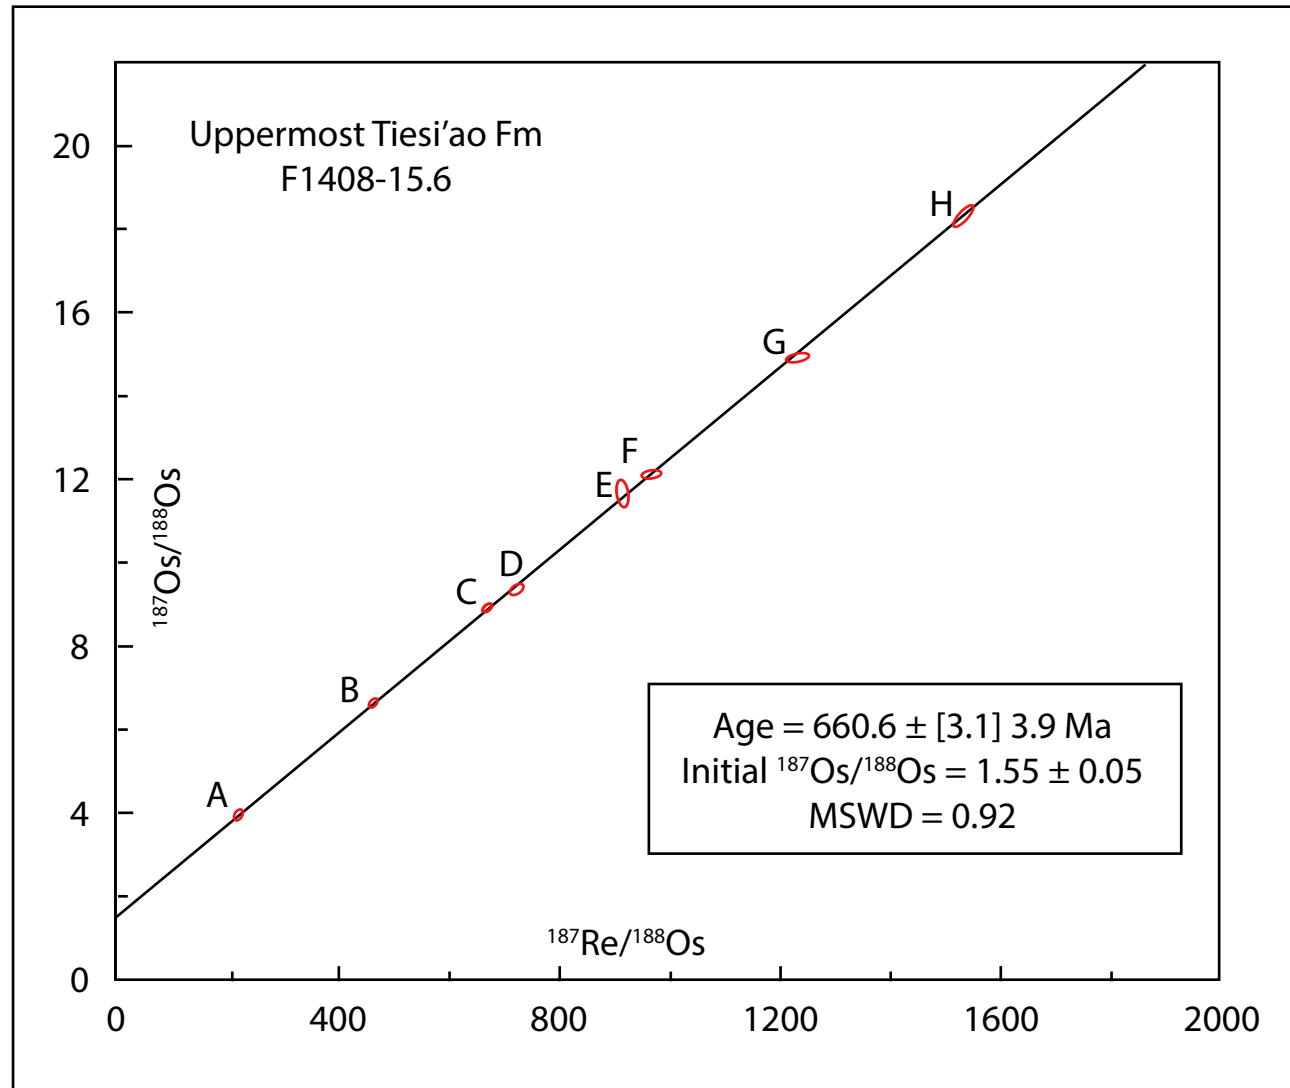

Fig. DR1

Table DR2: Re and Os elemental abundance and isotopic composition data.

|   | Batch/Sample | Re (ppb) | ±    | Os (ppt) | ±     | <sup>187</sup> Re/ <sup>188</sup> Os | ±       | <sup>187</sup> Os/ <sup>188</sup> Os | ±      | rho <sup>a</sup> | Osi <sup>b</sup> |
|---|--------------|----------|------|----------|-------|--------------------------------------|---------|--------------------------------------|--------|------------------|------------------|
| A | F1408-15.6-A | 21.78    | 0.07 | 698.32   | 10.34 | 227.5485                             | 2.3900  | 4.0708                               | 0.0972 | 0.4020           | 1.555            |
| B | F1408-15.6-B | 26.93    | 0.08 | 542.60   | 4.35  | 433.5642                             | 2.5707  | 6.3595                               | 0.0457 | 0.6282           | 1.566            |
| C | F1408-15.6-C | 29.10    | 0.10 | 438.38   | 3.90  | 702.2644                             | 4.8242  | 9.2939                               | 0.0707 | 0.6965           | 1.529            |
| D | F1408-15.6-D | 16.64    | 0.05 | 249.66   | 2.72  | 711.5407                             | 7.4296  | 9.4431                               | 0.1070 | 0.8514           | 1.576            |
| E | F1408-15.6-E | 32.84    | 0.08 | 429.64   | 7.96  | 935.2667                             | 4.1180  | 11.9262                              | 0.2546 | 0.8030           | 1.586            |
| F | F1408-15.6-F | 31.46    | 0.08 | 402.28   | 3.89  | 977.4649                             | 7.5815  | 12.3445                              | 0.1030 | 0.8319           | 1.537            |
| G | F1408-15.6-G | 28.36    | 0.07 | 325.52   | 3.61  | 1257.4349                            | 12.5328 | 15.4249                              | 0.1605 | 0.8945           | 1.522            |
| H | F1408-15.6-H | 32.79    | 0.08 | 350.49   | 5.43  | 1536.0020                            | 13.9777 | 18.5838                              | 0.1758 | 0.9436           | 1.601            |

GPS co-ordinates for sample F1408-15.6: 27.96968, 108.83760

Stated significant figures are required for isochron reproduction. Uncertainties are given as 2σ for <sup>187</sup>Re/<sup>188</sup>Os and <sup>187</sup>Os/<sup>188</sup>Os and <sup>192</sup>Os.

The uncertainty includes the 2 SE uncertainty for mass spectrometer analysis plus uncertainties for Os blank abundance and isotopic composition.

<sup>a</sup> Rho is the associated error correlation.

<sup>b</sup> Osi = initial <sup>187</sup>Os/<sup>188</sup>Os isotope ratio calculated 660 Ma.

Table DR3: Re-Os and initial isotope data for the post-glacial Twitya, Taishir and Datangpo formations

| Section - Formation        | Height (m) from contact with Sturtian diamictite | Re (ppb) | ±     | Os (ppt) | ±    | $^{187}\text{Re}/^{188}\text{Os}$ | ±    | $^{187}\text{Os}/^{188}\text{Os}$ | ±    | $\rho^a$ | $\text{Osi}^b$ | % of UCC Os | % of mantle Os | F of cont. weathering = (Rsw-Run)/(Rucc-Run) |
|----------------------------|--------------------------------------------------|----------|-------|----------|------|-----------------------------------|------|-----------------------------------|------|----------|----------------|-------------|----------------|----------------------------------------------|
| <b>Twitya Fm</b>           |                                                  |          |       |          |      |                                   |      |                                   |      |          |                |             |                |                                              |
| 64°32'03.8"N 129°23'42.0"W |                                                  |          |       |          |      |                                   |      |                                   |      |          |                |             |                |                                              |
| F1173                      | 0.1                                              | 1.88     | 0.006 | 35.7     | 0.3  | 470.3                             | 3.9  | 6.65                              | 0.06 | 0.84     | 1.44           | 95.9        | 4.1            | 0.96                                         |
| F1173                      | 0.5                                              | 2.28     | 0.007 | 39.8     | 0.4  | 515.7                             | 5.1  | 6.77                              | 0.08 | 0.72     | 1.05           | 70.0        | 30.0           | 0.67                                         |
| F1173                      | 1.0                                              | 1.83     | 0.006 | 32.4     | 0.4  | 483.9                             | 5.1  | 6.07                              | 0.08 | 0.74     | 0.71           | 47.2        | 52.8           | 0.42                                         |
| F1173                      | 1.6                                              | 1.09     | 0.004 | 27.3     | 0.3  | 285.2                             | 3.1  | 3.81                              | 0.05 | 0.73     | 0.64           | 42.9        | 57.1           | 0.38                                         |
| F1173                      | 2.0                                              | 0.65     | 0.002 | 16.0     | 0.2  | 282.7                             | 3.9  | 3.59                              | 0.06 | 0.78     | 0.45           | 30.2        | 69.8           | 0.24                                         |
| F1173                      | 2.6                                              | 0.97     | 0.003 | 21.9     | 0.7  | 322.1                             | 15.5 | 4.00                              | 0.28 | 0.68     | 0.42           | 28.3        | 71.7           | 0.21                                         |
| F1173                      | 3.1                                              | 1.30     | 0.004 | 28.9     | 0.3  | 338.5                             | 3.6  | 4.39                              | 0.06 | 0.73     | 0.64           | 42.4        | 57.6           | 0.37                                         |
| F1173                      | 3.7                                              | 2.00     | 0.006 | 43.6     | 0.3  | 347.7                             | 2.3  | 4.51                              | 0.03 | 0.69     | 0.65           | 43.5        | 56.5           | 0.38                                         |
| F1173                      | 4.9                                              | 1.00     | 0.003 | 23.2     | 0.2  | 322.4                             | 3.8  | 4.29                              | 0.06 | 0.75     | 0.72           | 47.7        | 52.3           | 0.43                                         |
| F1173                      | 8.5                                              | 1.27     | 0.004 | 24.8     | 0.2  | 406.8                             | 3.6  | 5.14                              | 0.06 | 0.66     | 0.62           | 41.3        | 58.7           | 0.36                                         |
| F1173                      | 15.5                                             | 0.59     | 0.002 | 17.1     | 0.1  | 231.3                             | 2.0  | 3.06                              | 0.04 | 0.66     | 0.50           | 33.2        | 66.8           | 0.27                                         |
| F1173                      | 22.5                                             | 0.59     | 0.002 | 16.1     | 0.1  | 248.3                             | 2.2  | 3.28                              | 0.04 | 0.65     | 0.53           | 35.2        | 64.8           | 0.29                                         |
| <b>Taishir Fm</b>          |                                                  |          |       |          |      |                                   |      |                                   |      |          |                |             |                |                                              |
| 46°40'19.9"N 96°33'38.9"E  |                                                  |          |       |          |      |                                   |      |                                   |      |          |                |             |                |                                              |
| A1310                      | 0.2                                              | 0.96     | 0.02  | 334.9    | 3.3  | 16.6                              | 0.4  | 1.63                              | 0.03 | 0.424    | 1.44           | 96.2        | 3.8            | 0.96                                         |
| A1310                      | 0.6                                              | 0.73     | 0.01  | 142.1    | 1.5  | 30.4                              | 0.7  | 1.83                              | 0.04 | 0.412    | 1.49           | 99.5        | 0.5            | 0.99                                         |
| A1310                      | 0.7                                              | 0.19     | 0.01  | 46.9     | 0.5  | 23.4                              | 0.8  | 1.56                              | 0.03 | 0.320    | 1.30           | 86.9        | 13.1           | 0.86                                         |
| A1310                      | 0.9                                              | 0.30     | 0.00  | 83.5     | 0.8  | 20.2                              | 0.4  | 1.48                              | 0.03 | 0.483    | 1.25           | 83.6        | 16.4           | 0.82                                         |
| A1309                      | 1.2                                              | 1.89     | 0.01  | 95.7     | 0.4  | 116.8                             | 1.2  | 1.89                              | 0.01 | 0.969    | 0.60           | 39.7        | 60.3           | 0.34                                         |
| F1218                      | 1.3                                              | 0.30     | 0.00  | 89.3     | 1.0  | 17.5                              | 0.4  | 0.81                              | 0.02 | 0.698    | 0.61           | 40.8        | 59.2           | 0.35                                         |
| A1310                      | 1.6                                              | 1.04     | 0.01  | 81.5     | 0.3  | 71.9                              | 0.5  | 1.42                              | 0.01 | 0.861    | 0.62           | 41.5        | 58.5           | 0.36                                         |
| A1310                      | 2.1                                              | 2.02     | 0.01  | 124.8    | 0.5  | 93.4                              | 0.4  | 1.66                              | 0.01 | 0.939    | 0.63           | 41.7        | 58.3           | 0.36                                         |
| F1218                      | 2.3                                              | 1.03     | 0.01  | 70.7     | 0.9  | 80.9                              | 1.7  | 1.28                              | 0.04 | 0.680    | 0.38           | 25.3        | 74.7           | 0.18                                         |
| F1420                      | 3.0                                              | 11.99    | 0.03  | 329.1    | 1.9  | 247.0                             | 1.1  | 3.25                              | 0.02 | 0.591    | 0.52           | 34.5        | 65.5           | 0.28                                         |
| F1420                      | 3.4                                              | 12.75    | 0.03  | 324.0    | 2.0  | 274.6                             | 1.3  | 3.56                              | 0.02 | 0.604    | 0.53           | 35.1        | 64.9           | 0.29                                         |
| F1420                      | 3.6                                              | 8.76     | 0.03  | 211.7    | 1.5  | 299.5                             | 1.9  | 3.97                              | 0.03 | 0.605    | 0.66           | 43.7        | 56.3           | 0.38                                         |
| F1420                      | 3.8                                              | 6.62     | 0.03  | 173.8    | 1.3  | 265.9                             | 1.9  | 3.56                              | 0.03 | 0.537    | 0.61           | 40.8        | 59.2           | 0.35                                         |
| F1420                      | 4.0                                              | 29.10    | 0.07  | 595.4    | 4.1  | 382.0                             | 1.9  | 4.89                              | 0.03 | 0.619    | 0.67           | 44.7        | 55.3           | 0.40                                         |
| F1420                      | 4.2                                              | 5.56     | 0.01  | 163.3    | 2.7  | 226.5                             | 4.3  | 3.05                              | 0.10 | 0.571    | 0.55           | 36.5        | 63.5           | 0.31                                         |
| F1420                      | 4.4                                              | 22.33    | 0.05  | 475.2    | 3.3  | 364.9                             | 1.8  | 4.81                              | 0.03 | 0.614    | 0.78           | 51.9        | 48.1           | 0.47                                         |
| F1420                      | 4.6                                              | 15.57    | 0.04  | 377.9    | 2.3  | 289.7                             | 1.4  | 3.65                              | 0.02 | 0.601    | 0.45           | 29.9        | 70.1           | 0.23                                         |
| F1420                      | 5.4                                              | 4.54     | 0.01  | 188.2    | 1.2  | 148.3                             | 0.9  | 2.24                              | 0.02 | 0.607    | 0.60           | 39.7        | 60.3           | 0.34                                         |
| F1420                      | 5.6                                              | 22.04    | 0.05  | 659.8    | 3.9  | 227.4                             | 1.1  | 3.29                              | 0.02 | 0.599    | 0.78           | 51.7        | 48.3           | 0.47                                         |
| F1420                      | 5.8                                              | 9.31     | 0.02  | 438.9    | 2.3  | 131.7                             | 0.6  | 2.34                              | 0.01 | 0.589    | 0.88           | 58.7        | 41.3           | 0.55                                         |
| F1420                      | 6.2                                              | 2.52     | 0.01  | 154.8    | 0.8  | 95.2                              | 0.5  | 1.75                              | 0.01 | 0.528    | 0.69           | 46.3        | 53.7           | 0.41                                         |
| F1218                      | 6.5                                              | 0.83     | 0.01  | 45.6     | 0.5  | 107.9                             | 1.8  | 1.91                              | 0.04 | 0.682    | 0.71           | 47.6        | 52.4           | 0.43                                         |
| F1420                      | 6.6                                              | 2.50     | 0.01  | 126.8    | 0.2  | 115.1                             | 0.6  | 1.75                              | 0.01 | 0.540    | 0.47           | 31.6        | 68.4           | 0.25                                         |
| F1420                      | 6.8                                              | 3.01     | 0.01  | 186.7    | 0.2  | 96.1                              | 0.5  | 1.96                              | 0.01 | 0.553    | 0.89           | 59.5        | 40.5           | 0.56                                         |
| F1420                      | 8.6                                              | 2.34     | 0.01  | 125.6    | 0.2  | 110.1                             | 0.7  | 1.87                              | 0.01 | 0.537    | 0.65           | 43.3        | 56.7           | 0.38                                         |
| F1218                      | 9.4                                              | 0.37     | 0.01  | 57.3     | 0.7  | 36.5                              | 1.1  | 1.46                              | 0.04 | 0.501    | 1.05           | 70.2        | 29.8           | 0.67                                         |
| F1420                      | 9.8                                              | 3.34     | 0.01  | 244.4    | 1.1  | 77.9                              | 0.4  | 1.52                              | 0.01 | 0.553    | 0.66           | 43.8        | 56.2           | 0.39                                         |
| <b>Datangpo Fm</b>         |                                                  |          |       |          |      |                                   |      |                                   |      |          |                |             |                |                                              |
| 28°30'52.6"N 109°50'26.9"E |                                                  |          |       |          |      |                                   |      |                                   |      |          |                |             |                |                                              |
| F1406-0.1                  | 0.1                                              | 12.97    | 0.03  | 160.14   | 1.72 | 1045.1                            | 7.3  | 13.00                             | 0.12 | 0.652    | 1.44           | 96.0        | 4.0            | 0.96                                         |
| F1406-0.3                  | 0.3                                              | 3.18     | 0.01  | 37.79    | 0.41 | 1122.7                            | 9.6  | 13.66                             | 0.13 | 0.663    | 1.25           | 83.2        | 16.8           | 0.82                                         |
| F1406-0.5                  | 0.5                                              | 0.54     | 0.01  | 27.09    | 0.17 | 125.1                             | 2.7  | 2.41                              | 0.02 | 0.148    | 1.03           | 68.6        | 31.4           | 0.66                                         |
| F1406-0.7                  | 0.7                                              | 4.65     | 0.01  | 52.78    | 0.69 | 1213.3                            | 11.9 | 14.35                             | 0.18 | 0.700    | 0.94           | 62.3        | 37.7           | 0.59                                         |
| F1406-1.0                  | 1.0                                              | 6.03     | 0.02  | 129.02   | 0.83 | 362.9                             | 1.7  | 4.83                              | 0.03 | 0.556    | 0.81           | 54.2        | 45.8           | 0.50                                         |
| F1406-1.1                  | 1.1                                              | 3.79     | 0.01  | 78.24    | 0.51 | 377.1                             | 1.8  | 4.85                              | 0.03 | 0.552    | 0.68           | 45.7        | 54.3           | 0.41                                         |
| F1406-1.3                  | 1.3                                              | 2.58     | 0.01  | 52.37    | 0.36 | 384.5                             | 2.1  | 4.90                              | 0.03 | 0.545    | 0.65           | 43.2        | 56.8           | 0.38                                         |

Uncertainties are given as  $2\sigma$  for  $^{187}\text{Re}/^{188}\text{Os}$  and  $^{187}\text{Os}/^{188}\text{Os}$  and  $^{187}\text{Os}$  composition.

<sup>a</sup>  $\rho$  is the associated error correlation.

<sup>b</sup>  $\text{Osi}$  = initial  $^{187}\text{Os}/^{188}\text{Os}$  isotope ratio calculated 660 Ma.
